# Supplementary material for: Steric effects in the design of Co-Schiff base complexes for the catalytic oxidation of lignin models to para-benzoquinones
Source: Royal Society of Chemistry journal article supplement (doi:10.1039/c4gc00709c), 2014-01-01
Supplement: c4gc00709c1.pdf [file c4gc00709c1.pdf]

# Steric effects in the design of Co-Schiff base complexes for the catalytic oxidation of lignin models to *para*-benzoquinones

Berenger Biannic<sup>a</sup>, Joseph J. Bozell<sup>a,\*</sup> and Thomas Elder<sup>b</sup>

<sup>a</sup>Center for Renewable Carbon, Center for the Catalytic Conversion of Biomass (C3Bio), 2506 Jacob Drive, University of Tennessee, Knoxville, TN 37996; <sup>b</sup>USDA-Forest Service, Southern Research Station, 251 DeVall Drive, Auburn, AL 36849

Fax: (+) 1 865 946 1109 - E-mail: jbozell@utk.edu

## Table of Contents

|                                                                                |    |
|--------------------------------------------------------------------------------|----|
| 1. General Information                                                         | 2  |
| 2. General Procedure for the Oxidation of <i>p</i> -Phenols to Benzoquinones   | 2  |
| 3. Synthesis of Schiff Bases <b>16a-f</b>                                      | 2  |
| 4. Synthesis of Co-Complexes <b>17a-f</b>                                      | 6  |
| 5. <sup>1</sup> H and <sup>13</sup> C-NMR Spectra of New Synthesized Compounds | 8  |
| 6. Computational Methodology                                                   | 16 |

## 1. General Information

All reactions were carried out under an atmosphere of nitrogen unless otherwise specified. Anhydrous tetrahydrofuran (THF) was purified by distillation over sodium/benzophenone. All reagents and solvents were purchased from commercial sources and were used as received. Analytical thin layer chromatography (TLC) was performed using 250  $\mu\text{m}$  Silica Gel 60 F254 pre-coated plates. Flash column chromatography was performed using 230-400 Mesh 60Å Silica Gel. The eluents employed are reported as volume:volume percentages. Melting points were recorded on a Fisher-Johns melting point apparatus and are uncorrected. Catalytic oxidations were carried out in thick walled glass reactors under the oxygen pressure indicated in the text.  $^1\text{H}$  and  $^{13}\text{C}$  NMR spectra were measured in  $\text{CDCl}_3$  using a Varian Unity 400 MHz instrument. Chemical shifts are reported relative to tetramethylsilane or solvent resonance and reported in ppm. Infrared spectra were obtained on a Perkin-Elmer Spectrum One FT-IR spectrometer at  $4\text{ cm}^{-1}$  resolution and are reported in  $\text{cm}^{-1}$ . High resolution mass spectra (HRMS) were obtained by The Center for Mass Spectrometry of the Department of Chemistry at the University of Tennessee, and are reported as  $m/e$  (relative ratio). Accurate masses are reported for the molecular ion  $(\text{M}+\text{H})^+$  or a suitable fragment ion and are reported with an error  $< 5\text{ ppm}$ . 1-Octylpiperazine **15b**, 1-methylpiperazine **15c**, 1-phenylpiperazine **15d** and piperidine **15e** were purchased from Sigma-Aldrich and used as received.

## 2. General Procedures for the Oxidation of *p*-Phenols to Benzoquinones

In a Fisher-Porter bottle, *p*-phenol substrate (1 mmol) and Co-Schiff base complex **17a-f** (0.05 mmol) were combined in 5 mL of MeOH or 5 mL of MeOH/ $\text{CH}_2\text{Cl}_2$  (4/1) for catalyst **22**. The bottle was flushed with oxygen three times and then pressurized with oxygen to 50 psi. After 16 hours under vigorous stirring, the reaction mixture is concentrated under vacuum at room temperature and the crude material purified by flash chromatography (eluent: gradient 0-5-10% EtOAc/ $\text{CH}_2\text{Cl}_2$ ).

- 2,6-dimethoxybenzoquinone **4** (bright yellow):<sup>1</sup> recovered by filtration at the end of the reaction and satisfactorily matched all previously reported data. 2,6-Dimethoxybenzoquinone is only partially soluble in methanol, and between 5 and 10% of residual product remains in solution that can be purified by column chromatography (eluent: gradient 0-5-10% EtOAc/ $\text{CH}_2\text{Cl}_2$ ). When catalyst **22** was used, the reaction mixture was concentrated under vacuum and purified by flash chromatography (eluent: gradient 0-5-10% EtOAc/ $\text{CH}_2\text{Cl}_2$ ).

- 2-methoxybenzoquinone **5** (light green):<sup>1</sup> purified by flash chromatography (eluent: gradient 0-5% EtOAc/ $\text{CH}_2\text{Cl}_2$ ) and satisfactorily matched all previously reported data.

## 3. Synthesis of Schiff Bases 16a-f

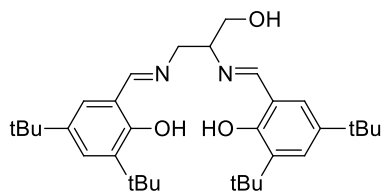

### 2,3-bis((E)-(3,5-di-tert-butyl-2-hydroxybenzylidene)amino)propan-1-ol (**13**).

To a solution of 2,3-dibromopropanol **8** (2.179 g, 10 mmoles) in **dry DMF** (60 mL) was added  $\text{NaN}_3$  (6.500 g, 100 mmoles). The reaction mixture was heated at reflux under  $\text{N}_2$  for 24 hours (dark brown), cooled to room temperature and treated with water (100 mL). The crude product was extracted with EtOAc (2 x 100 mL), rinsed with water (2 x 100 mL), dried over  $\text{Na}_2\text{SO}_4$  and concentrated to afford a mixture of diazide **9** and 2-bromoprop-2-en-1-ol **10**<sup>2</sup> (10/1) as a light brown oil which was used in the next step without further purification; 2,3-diazidopropan-1-ol **9**:  $^1\text{H-NMR}$  (400 MHz,  $\text{CDCl}_3$ ): 3.77-3.62 (m, 3H), 3.47 (dq,  $J = 18.1, 4.4\text{ Hz}$ , 2H);  $^{13}\text{C-NMR}$  (100 MHz,  $\text{CDCl}_3$ ):  $\delta$  62.8, 62.4, 51.7.

<sup>1</sup> D. Cedenó, J. J. Bozell *Tetrahedron Lett.* **2012**, 53, 2380-2383.

<sup>2</sup> P. Hayes, C. Maignan *Synthesis* **1999**, 5, 783-786.

When non-dry DMF was used as solvent, 1,3-diazidopropan-2-ol was isolated as the major product:  $^1\text{H-NMR}$  (400 MHz,  $\text{CDCl}_3$ ): 3.95-3.91 (m, 1H), 3.42-3.36 (dd,  $J = 7.8$  Hz, 4H);  $^{13}\text{C-NMR}$  (100 MHz,  $\text{CDCl}_3$ ):  $\delta$  69.8, 54.1.

To a solution of diazide **9** obtained above in THF/ $\text{H}_2\text{O}$  (50 mL, 4/1) was added  $\text{Ph}_3\text{P}$  (5.246 g, 20 mmoles) portionwise at room temperature ( $\text{N}_2$  evolution was observed). The reaction mixture was heated at reflux overnight, diluted with water (20 mL) and THF was evaporated under vacuum. The mixture was triturated, the white solid formed was filtered, rinsed with  $\text{H}_2\text{O}$  (10 mL) and the aqueous solution was concentrated under vacuum ( $60^\circ\text{C}$ ) to give 2,3-diaminopropan-1-ol **11** as a yellow oil which was used in the next step without further purification. Presence of residual water or DMF in the crude material does not affect the yield of the next reaction.

To a solution of **11** obtained above in MeOH (50 mL) was added 3,5-di-tert-butyl-2-hydroxybenzaldehyde **12** (2.340 g, 10 mmoles) in one portion. The reaction mixture was heated at reflux for 6 hours, concentrated under vacuum and the crude material purified by flash chromatography (gradient; 0-50-100%  $\text{CH}_2\text{Cl}_2$ /hexanes) to give **13** as a thick bright yellow oil (2.103 g, 41%) which slowly solidified over time; mp  $90\text{-}93^\circ\text{C}$ ;  $R_f = 0.25$  (50%  $\text{CH}_2\text{Cl}_2$ /hexanes + 1%  $\text{Et}_3\text{N}$ ); IR (neat) 3354, 2953, 2911, 2857, 1626, 1439, 1249, 1172, 877, 730  $\text{cm}^{-1}$ ;  $^1\text{H-NMR}$  (400 MHz,  $\text{CDCl}_3$ ):  $\delta$  13.48 (s, 1H), 13.33 (bs, 1H), 8.45 (s, 1H), 8.36 (s, 1H), 7.38 (d,  $J = 2.4$  Hz, 1H), 7.36 (d,  $J = 2.4$  Hz, 1H), 7.09 (d,  $J = 2.4$  Hz, 1H), 7.05 (d,  $J = 2.4$  Hz, 1H), 3.96-3.93 (m, 2H), 3.88-3.83 (m, 1H), 3.76-3.66 (m, 2H), 1.43 (s, 9H), 1.42 (s, 9H), 1.28 (s, 18H);  $^{13}\text{C-NMR}$  (100 MHz,  $\text{CDCl}_3$ ):  $\delta$  168.3, 168.0, 140.4, 140.1, 136.6, 127.4, 127.2, 126.4, 126.1, 117.8, 117.7, 71.6, 64.6, 61.1, 35.0, 34.1, 31.5, 29.5, 29.4; HRMS (DART-TOF) Calcd for  $\text{C}_{33}\text{H}_{50}\text{N}_2\text{O}_3$  ( $\text{M}+\text{H}$ ) $^+$ : 523.38997; found 523.38990.

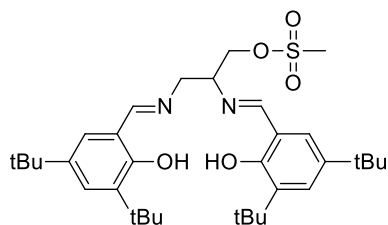

#### 2,3-bis((E)-(3,5-di-tert-butyl-2-hydroxybenzylidene)amino)propyl methanesulfonate (**14**).

To a solution of alcohol **13** (1.000 g, 1.92 mmoles) and  $\text{Et}_3\text{N}$  (517  $\mu\text{L}$ , 3.84 mmoles) in  $\text{CH}_2\text{Cl}_2$  (10 mL) was added methanesulfonyl chloride (221  $\mu\text{L}$ , 2.87 mmoles) dropwise at  $0^\circ\text{C}$ . The reaction mixture was stirred at the same temperature for 1 hour, quenched by addition of  $\text{NaHCO}_3$  (20 mL of a saturated aqueous solution) and diluted with  $\text{CH}_2\text{Cl}_2$  (20 mL). The organic fraction was separated, dried over  $\text{Na}_2\text{SO}_4$  and concentrated to give **14** as a thick yellow oil (1.094 g, 95%) which slowly solidified over time; mp  $166\text{-}169^\circ\text{C}$ ;  $R_f = 0.25$  (50%  $\text{CH}_2\text{Cl}_2$ /hexanes + 1%  $\text{Et}_3\text{N}$ ); IR (neat) 2959, 2869, 1630, 1439, 1353, 1332, 1180, 996, 979, 826  $\text{cm}^{-1}$ ;  $^1\text{H-NMR}$  (400 MHz,  $\text{CDCl}_3$ ):  $\delta$  13.26 (s, 1H), 13.06 (bs, 1H), 8.46 (s, 1H), 8.38 (s, 1H), 7.40 (d,  $J = 2.4$  Hz, 1H), 7.38 (d,  $J = 2.4$  Hz, 1H), 7.09 (d,  $J = 2.4$  Hz, 1H), 7.06 (d,  $J = 2.4$  Hz, 1H), 4.54 (dd,  $J = 10.8, 4.4$  Hz, 1H), 4.43 (dd,  $J = 10.0, 7.2$  Hz, 1H), 3.98-3.79 (m, 3H), 3.01 (s, 3H); 1.43 (s, 9H), 1.42 (s, 9H), 1.28 (s, 18H);  $^{13}\text{C-NMR}$  (100 MHz,  $\text{CDCl}_3$ ):  $\delta$  169.0, 168.8, 157.9, 157.9, 140.5, 140.3, 136.8, 136.7, 127.9, 127.5, 126.6, 126.3, 117.6, 117.5, 70.4, 68.3, 60.8, 37.5, 35.0, 34.1, 34.1, 31.6, 31.4, 31.4, 29.4; HRMS (DART-TOF) Calcd for  $\text{C}_{34}\text{H}_{52}\text{N}_2\text{O}_5\text{S}$  ( $\text{M}+\text{H}$ ) $^+$ : 601.36752; found 601.36934.

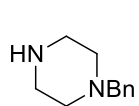

#### 1-benzylpiperazine (**15a**).<sup>3</sup>

Benzyl bromide (3.56 mL, 30 mL) was added dropwise at  $0^\circ\text{C}$  to a solution of piperazine (12.92 g, 150 mmoles) in dry  $\text{CH}_2\text{Cl}_2$  (150 mL). The reaction mixture was stirred at the same temperature for 1 h, rinsed with  $\text{NaHCO}_3$  (2 x 100 mL of a saturated aqueous solution), dried over  $\text{Na}_2\text{SO}_4$  and concentrated under vacuum. The crude product was dissolved in 50 mL of absolute EtOH and the white solid formed (1,4-dibenzylpiperazine) was filtered off. The solvent was evaporated under vacuum to give the product as a colorless oil (3.295 g, 63%) which satisfactorily matched all previously reported data.

<sup>3</sup> D. E. Bergbreiter, P.L. Osburn, C. Li *Org. Lett.* **2002**, *4*, 737-740.

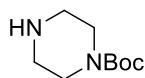

### 1-Boc-piperazine (15f).<sup>4</sup>

Boc<sub>2</sub>O (6.72 g, 30.8 mmole) was added dropwise over 30 minutes to a solution of piperazine (6.685 g, 77.6 mmole) in *t*-BuOH (90 mL) and NaOH (12 mL of a 2.5N aqueous solution). The reaction mixture was stirred at room temperature for 1h. *t*-BuOH was evaporated under vacuum and 1,4-di-Bocpiperazine was filtered off. The aqueous layer was extracted with CH<sub>2</sub>Cl<sub>2</sub> (3 x 50 mL), the organic fractions were combined, dried over Na<sub>2</sub>SO<sub>4</sub> and condensed under vacuum to give the product as a light yellow oil (4.807 g, 84%) which slowly crystallized over time and satisfactorily matched all previously reported data.

### Schiff base 16a.

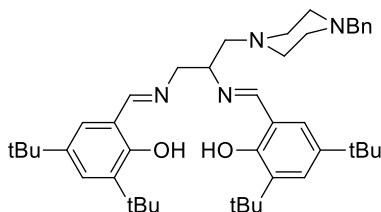

To a solution of mesylate **14** (510.8 mg, 0.85 mmole) in dry MeCN (8 mL) was added successively DIPEA (593 μL, 3.4 mmole), 1-benzylpiperazine **15a** (450.1 mg, 2.55 mmole) and potassium iodide (30.0 mg, 0.18 mmole) at room temperature. The reaction mixture was heated at reflux for 24 hours (dark orange), quenched by addition of water (30 mL) and extracted with CH<sub>2</sub>Cl<sub>2</sub> (2 x 50 mL). The organic fractions were combined, dried over Na<sub>2</sub>SO<sub>4</sub>, concentrated under vacuum and the crude product purified by flash chromatography (gradient; 0-2% MeOH/CH<sub>2</sub>Cl<sub>2</sub>) to give the product as a thick bright yellow oil (376.3 mg, 65%) which slowly solidified over time; mp 91-93 °C; *R*<sub>f</sub> = 0.10 (100% CH<sub>2</sub>Cl<sub>2</sub>); IR (neat) 2952, 2866, 2807, 1630, 1460, 1443, 1360, 1252, 1176, 830, 736, 698 cm<sup>-1</sup>; <sup>1</sup>H-NMR (400 MHz, CDCl<sub>3</sub>): δ 13.68 (bs, 1H), 13.56 (bs, 1H), 8.34 (s, 1H), 8.33 (s, 1H), 7.34-7.04 (m, 7H), 7.04 (d, *J* = 2.4 Hz, 1H), 7.02 (d, *J* = 2.4 Hz, 1H), 4.09 (dd, *J* = 12.0, 2.4 Hz, 1H), 3.75-3.60 (m, 2H), 3.49 (s, 2H), 2.73 (dd, *J* = 13.2, 6.8 Hz, 1H), 2.60-2.46 (m, 5H), 1.42 (s, 9H), 1.41 (s, 9H), 1.27 (s, 9H), 1.26 (s, 9H); <sup>13</sup>C-NMR (100 MHz, CDCl<sub>3</sub>): δ 167.8, 167.1, 158.3, 158.2, 140.2, 140.2, 138.4, 136.8, 136.7, 129.4, 128.4, 127.2, 127.2, 127.1, 126.4, 126.2, 118.1, 118.0, 67.5, 63.3, 63.0, 62.1, 54.0, 53.4, 35.2, 34.3, 31.7, 29.6, 29.6; HRMS (DART-TOF) Calcd for C<sub>44</sub>H<sub>64</sub>N<sub>4</sub>O<sub>2</sub> (M+H)<sup>+</sup>: 681.51075; found 681.50843.

### Schiff base 16b.

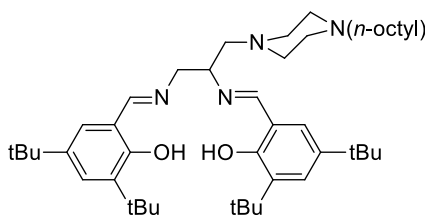

To a solution mesylate **14** (450.6 mg, 0.75 mmole) in dry MeCN (8 mL) was added successively DIPEA (522 μL, 3.0 mmole), 1-*n*-octylpiperazine **15b** (446.4 mg, 2.25 mmole) and potassium iodide (30.0 mg, 0.18 mmole) at room temperature. The reaction mixture was heated at reflux for 24 hours (dark orange), quenched by addition of water (30 mL) and extracted with CH<sub>2</sub>Cl<sub>2</sub> (2 x 50 mL). The organic fractions were combined, dried over Na<sub>2</sub>SO<sub>4</sub>, concentrated under vacuum and the crude product purified by flash chromatography (gradient; 0-1% MeOH/CH<sub>2</sub>Cl<sub>2</sub>) to give the product as a thick bright yellow gum (376.3 mg, 79%); *R*<sub>f</sub> = 0.15 (100% CH<sub>2</sub>Cl<sub>2</sub>); IR (neat) 2952, 2859, 2803, 1626, 1460, 1443, 1273, 1252, 1176, 830, 729 cm<sup>-1</sup>; <sup>1</sup>H-NMR (400 MHz, CDCl<sub>3</sub>): δ 13.70 (bs, 1H), 13.57 (bs, 1H), 8.36 (s, 1H), 8.33 (s, 1H), 7.35 (d, *J* = 2.6 Hz, 1H), 7.33 (d, *J* = 2.6 Hz, 1H), 7.04 (d, *J* = 2.6 Hz, 1H), 7.03 (d, *J* = 2.6 Hz, 1H), 4.09 (dd, *J* = 12.4, 3.2 Hz, 1H), 3.75-3.60 (m, 2H), 2.75 (dd, *J* = 12.8, 6.8 Hz, 1H), 2.61-2.47 (m, 5H), 2.31 (t, *J* = 7.8 Hz, 2H), 1.47-1.41 (m, 20H), 1.32-1.27 (m, 28H), 0.88 (t, *J* = 6.6 Hz, 3H); <sup>13</sup>C-NMR (100 MHz, CDCl<sub>3</sub>): δ 167.8, 167.1, 158.3, 158.2, 140.2, 140.1, 136.8, 136.7, 127.2, 127.1, 126.4, 126.2, 118.0, 67.5, 63.0, 62.1, 59.1, 54.0, 53.5, 35.2, 34.3, 32.0, 31.7, 29.8, 29.6, 29.6, 29.5, 27.9, 27.1, 22.9, 14.3; HRMS (DART-TOF) Calcd for C<sub>45</sub>H<sub>74</sub>N<sub>4</sub>O<sub>2</sub> (M+H)<sup>+</sup>: 703.58900; found 703.58778.

<sup>4</sup> H. Naito, T. Hata, H. Urabe *Org. Lett.* **2010**, *12*, 1228–1230.

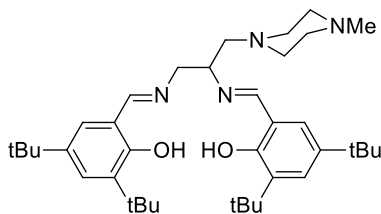

#### Schiff base 16c.

To a solution of mesylate **14** (231.3 mg, 0.38 mmole) in dry MeCN (3 mL) was added successively DIPEA (258  $\mu$ L, 1.5 mmole), 1-methylpiperazine **15c** (171  $\mu$ L, 1.5 mmole) and potassium iodide (6.0 mg, 0.036 mmole) at room temperature. The reaction mixture was heated at reflux for 24 hours (dark orange), quenched by addition of water (30 mL) and extracted with  $\text{CH}_2\text{Cl}_2$  (2 x 50 mL). The organic fractions were combined, dried over  $\text{Na}_2\text{SO}_4$ , concentrated under vacuum and the crude product purified by flash chromatography (gradient; 0-3% MeOH/ $\text{CH}_2\text{Cl}_2$ ) to give the product as a thick bright yellow oil (179.0 mg, 78%) which slowly solidified over time; mp 90-92  $^\circ\text{C}$ ;  $R_f$  = 0.20 (3% MeOH/ $\text{CH}_2\text{Cl}_2$ ); IR (neat) 2956, 2869, 1630, 1443, 1249, 1173, 830, 774, 733  $\text{cm}^{-1}$ ;  $^1\text{H-NMR}$  (400 MHz,  $\text{CDCl}_3$ ):  $\delta$  13.69 (bs, 1H), 13.56 (bs, 1H), 8.35 (s, 1H), 8.34 (s, 1H), 7.35 (d,  $J$  = 2.8 Hz, 1H), 7.33 (d,  $J$  = 2.8, 1H), 7.04 (d,  $J$  = 2.8 Hz, 1H), 7.03 (d,  $J$  = 2.8 Hz, 1H), 4.10 (dd,  $J$  = 12.0, 2.8 Hz, 1H), 3.74-3.60 (m, 2H), 2.75 (dd,  $J$  = 13.2, 6.8 Hz, 1H), 2.77-2.57 (m, 9H), 2.28 (s, 3H), 1.42 (s, 9H), 1.41 (s, 9H), 1.27 (s, 9H), 1.26 (s, 9H);  $^{13}\text{C-NMR}$  (100 MHz,  $\text{CDCl}_3$ ):  $\delta$  167.6, 166.9, 158.1, 158.0, 140.0, 139.9, 136.5, 136.5, 127.0, 126.9, 126.2, 126.0, 117.8, 67.3, 62.7, 61.8, 55.2, 53.7, 46.0, 35.0, 34.1, 31.4, 29.4, 29.4; HRMS (DART-TOF) Calcd for  $\text{C}_{38}\text{H}_{60}\text{N}_4\text{O}_2$  ( $\text{M}+\text{H}$ ) $^+$ : 605.47945; found 605.47781.

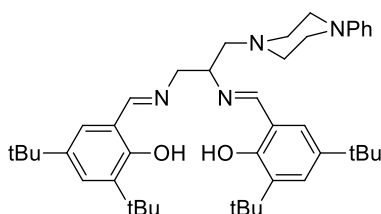

#### Schiff base 16d.

To a solution of mesylate **14** (400.3 mg, 0.66 mmole) in dry MeCN (7 mL) was added successively DIPEA (350  $\mu$ L, 2.0 mmoles), 1-phenylpiperazine **15d** (325  $\mu$ L, 2.0 mmoles) and potassium iodide (11.0 mg, 0.066 mmole) at room temperature. The reaction mixture was heated at reflux for 24 hours (dark orange), quenched by addition of water (30 mL) and extracted with  $\text{CH}_2\text{Cl}_2$  (2 x 50 mL). The organic fractions were combined, dried over  $\text{Na}_2\text{SO}_4$ , concentrated under vacuum and the crude product purified by flash chromatography (gradient; 0-30-50%  $\text{CH}_2\text{Cl}_2$ /hexanes) to give the product as a thick bright yellow oil (381.3 mg, 87%) which slowly solidified over time; mp 87-89  $^\circ\text{C}$ ;  $R_f$  = 0.25 (30%  $\text{CH}_2\text{Cl}_2$ /hexanes); IR (neat) 2952, 2866, 1630, 1443, 1249, 1173, 774, 729  $\text{cm}^{-1}$ ;  $^1\text{H-NMR}$  (400 MHz,  $\text{CDCl}_3$ ):  $\delta$  13.68 (bs, 1H), 13.57 (bs, 1H), 8.38 (s, 1H), 8.36 (s, 1H), 7.36 (d,  $J$  = 2.4 Hz, 1H), 7.34 (d,  $J$  = 2.4 Hz, 1H), 7.27 (m, 2H), 7.05 (d,  $J$  = 2.4 Hz, 1H), 7.04 (d,  $J$  = 2.4 Hz, 1H), 6.92 (d,  $J$  = 8.4 Hz, 2H), 6.85 (t,  $J$  = 7.2 Hz, 1H), 4.12 (dd,  $J$  = 12.0, 3.2 Hz, 1H), 3.78-3.65 (m, 2H), 3.19 (t,  $J$  = 4.8 Hz, 4H), 2.81 (dd,  $J$  = 12.8, 6.8 Hz, 1H), 2.78-2.63 (m, 5H), 1.43 (s, 9H), 1.42 (s, 9H), 1.27 (s, 18H);  $^{13}\text{C-NMR}$  (100 MHz,  $\text{CDCl}_3$ ):  $\delta$  167.7, 167.0, 158.1, 158.0, 151.3, 140.1, 140.0, 136.6, 136.5, 129.1, 127.1, 127.0, 126.2, 126.0, 119.7, 117.8, 117.8, 116.0, 67.4, 62.8, 61.8, 53.8, 49.2, 35.0, 34.1, 31.4, 29.4, 29.4; HRMS (DART-TOF) Calcd for  $\text{C}_{43}\text{H}_{62}\text{N}_4\text{O}_2$  ( $\text{M}+\text{H}$ ) $^+$ : 667.49510; found 667.49366.

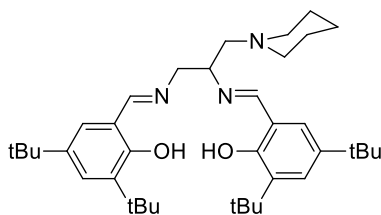

#### Schiff base 16e.

To a solution of mesylate **14** (400.9 mg, 0.66 mmole) in dry MeCN (7 mL) was added successively DIPEA (350  $\mu$ L, 2 mmoles), piperidine **15e** (198  $\mu$ L, 2 mmoles) and potassium iodide (11.0 mg, 0.066 mmole) at room temperature. The reaction mixture was heated at reflux for 24 hours (dark orange), quenched by addition of water (30 mL) and extracted with  $\text{CH}_2\text{Cl}_2$  (2 x 50 mL). The organic fractions were combined, dried over  $\text{Na}_2\text{SO}_4$ , concentrated under vacuum and the crude product purified by flash chromatography (gradient; 10-30%  $\text{CH}_2\text{Cl}_2$ /hexanes) to give the product as a thick bright yellow oil (381.3 mg, 87%) which slowly solidified over time; mp 92-95  $^\circ\text{C}$ ;  $R_f$  = 0.20 (30%  $\text{CH}_2\text{Cl}_2$ /hexanes); IR (neat) 2958, 2865, 1631, 1593, 1472, 1444, 1251, 1175, 829, 771  $\text{cm}^{-1}$ ;  $^1\text{H-NMR}$  (400 MHz,  $\text{CDCl}_3$ ):  $\delta$  13.26 (bs, 2H), 8.34 (s, 1H), 8.33 (s, 1H), 7.33 (d,  $J$  = 2.4 Hz, 1H), 7.32 (d,  $J$  = 2.4, 1H), 7.04 (d,  $J$  = 2.4 Hz, 1H), 7.02 (d,  $J$  = 2.4 Hz, 1H), 4.11 (dd,  $J$  = 11.2, 3.6 Hz, 1H), 3.76-3.70 (m, 1H), 3.61 (dd,  $J$  = 12.4, 8.4 Hz, 1H), 2.68 (dd,  $J$  = 12.8, 6.4 Hz, 1H), 2.54-2.40 (m, 5H), 1.58-1.53 (m, 4H), 1.44-1.41 (m, 20H), 1.26 (s, 9H), 1.26 (s, 9H);  $^{13}\text{C-NMR}$  (100 MHz,  $\text{CDCl}_3$ ):  $\delta$  167.5, 166.7, 158.1, 158.0, 139.9, 139.9, 136.5,

136.4, 126.9, 126.9, 126.1, 126.0, 117.9, 117.9, 67.4, 62.9, 62.7, 55.3, 35.0, 34.1, 31.4, 29.4, 29.4, 26.1, 24.3; HRMS (DART-TOF) Calcd for C<sub>38</sub>H<sub>59</sub>N<sub>3</sub>O<sub>2</sub> (M+H)<sup>+</sup>: 590.46855; found 590.46941.

#### Schiff base 16f.

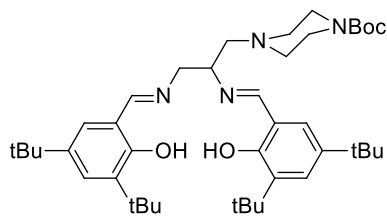

To a solution of mesylate **14** (450.6 mg, 0.75 mmole) in dry MeCN (8 mL) was added successively DIPEA (524  $\mu$ L, 3 mmoles), 1-Boc-piperazine **15f** (419.2 mg, 2.25 mmoles) and potassium iodide (30.0 mg, 0.18 mmole) at room temperature. The reaction mixture was heated at reflux for 24 hours (dark orange), quenched by addition of water (30 mL) and extracted with CH<sub>2</sub>Cl<sub>2</sub> (2 x 50 mL). The organic fractions were combined, dried over Na<sub>2</sub>SO<sub>4</sub>, concentrated under vacuum and the crude product purified by flash chromatography (gradient; 50-100% CH<sub>2</sub>Cl<sub>2</sub>/hexanes) to give the product as a thick bright yellow oil (367.7 mg, 71%) which slowly solidified over time; mp 90-92 °C; *R*<sub>f</sub> = 0.15 (100% CH<sub>2</sub>Cl<sub>2</sub>); IR (neat) 2952, 2869, 1695, 1626, 1443, 1363, 1245, 1176, 1006, 729 cm<sup>-1</sup>; <sup>1</sup>H-NMR (400 MHz, CDCl<sub>3</sub>):  $\delta$  13.63 (bs, 1H), 13.53 (bs, 1H), 8.36 (s, 1H), 8.34 (s, 1H), 7.35 (d, J = 2.8 Hz, 1H), 7.34 (d, J = 2.8, 1H), 7.05 (d, J = 2.8 Hz, 1H), 7.04 (d, J = 2.8 Hz, 1H), 4.08 (d, J = 11.6 Hz, 1H), 3.73-3.62 (m, 2H), 3.41 (bs, 4H), 2.76 (dd, J = 13.2, 6.0 Hz, 1H), 2.60 (dd, J = 12.8, 6.0 Hz, 1H), 2.47 (bs, 4H), 1.45 (s, 9H), 1.43 (s, 9H), 1.42 (s, 9H), 1.27 (s, 18H); <sup>13</sup>C-NMR (100 MHz, CDCl<sub>3</sub>):  $\delta$  167.9, 167.2, 158.3, 158.2, 155.0, 140.3, 140.2, 127.3, 127.2, 126.4, 126.2, 118.0, 118.0, 79.8, 67.5, 63.0, 62.1, 53.8, 35.2, 34.3, 31.7, 29.6, 29.6, 28.6; HRMS (DART-TOF) Calcd for C<sub>42</sub>H<sub>66</sub>N<sub>4</sub>O<sub>4</sub> (M+H)<sup>+</sup>: 691.51623; found 691.51329.

#### 4. Synthesis of Co-complexes 17a-f

##### Cobalt-Schiff base complex 17a.

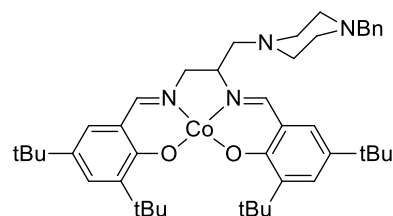

To a solution of Schiff base **16a** (121.3 mg, 0.18 mmol) in *i*-propanol (2 mL) was added a solution of Co(OAc)<sub>2</sub>·4H<sub>2</sub>O (44.3 mg, 0.18 mmol) in methanol (1 mL). The mixture was heated at reflux for 3 h under argon. The dark brown solution was concentrated and the product was precipitated in 15 mL of hexanes. The green brown solid was recovered by filtration, rinsed with hexanes and then dried under vacuum for 16 h at 80°C to give **17a** (102.1 mg, 78%) as a red/light brown solid. IR (neat) 2952, 2911, 2866, 1595, 1529, 1363, 1315, 1252, 1169, 788, 702 cm<sup>-1</sup>; HRMS (DART-TOF) Calcd for C<sub>44</sub>H<sub>62</sub>CoN<sub>4</sub>O<sub>2</sub> (M+H)<sup>+</sup>: 738.42830; found 738.42596.

##### Cobalt-Schiff base complex 17b.

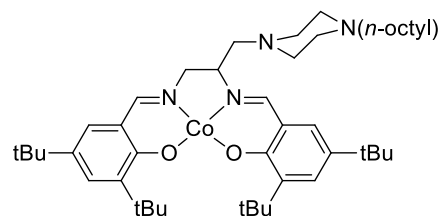

To a solution of Schiff base **16b** (260.3 mg, 0.37 mmol) in *i*-propanol (4 mL) was added a solution of Co(OAc)<sub>2</sub>·4H<sub>2</sub>O (110.6 mg, 0.44 mmol) in methanol (2 mL). The mixture was heated at reflux for 3 h under argon. The dark brown solution was concentrated and the product was precipitated in 15 mL of hexanes. The green brown solid was recovered by filtration, rinsed with hexanes and then dried under vacuum for 16 h at 80°C to give **17b** (221.2 mg, 78%) as a red/light brown solid. IR (neat) 2949, 2935, 2866, 1588, 1522, 1360, 1318, 1252, 1180, 844, 788 cm<sup>-1</sup>; HRMS (DART-TOF) Calcd for C<sub>45</sub>H<sub>72</sub>CoN<sub>4</sub>O<sub>2</sub> (M+H)<sup>+</sup>: 760.50655; found 760.50323.

##### Cobalt-Schiff base complex 17c.

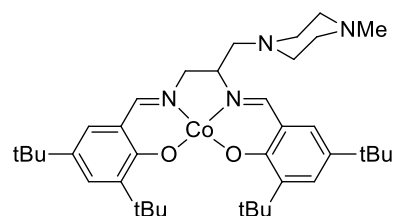

To a solution of Schiff base **16c** (115.8 mg, 0.19 mmol) in *i*-propanol (2 mL) was added a solution of Co(OAc)<sub>2</sub>·4H<sub>2</sub>O (71.5 mg, 0.28 mmol) in methanol (1 mL). The mixture was heated at reflux for 3 h under argon. The dark brown solution was concentrated and the product was precipitated in 15 mL of hexanes. The green brown solid was recovered by filtration, rinsed with hexanes and then dried under vacuum for 16 h at 80°C to give **17c** (125.7 mg,

83%) as a red/light brown solid. IR (neat) 2956, 2904, 2862, 1553, 1522, 1408, 1384, 1252, 1180, 788, 671, 615  $\text{cm}^{-1}$ ; HRMS (DART-TOF) Calcd for  $\text{C}_{38}\text{H}_{58}\text{CoN}_4\text{O}_2$  ( $\text{M}+\text{H}$ ) $^+$ : 662.39700; found 662.39375.

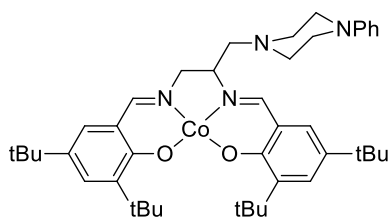

#### Cobalt-Schiff base complex 17d.

To a solution of Schiff base **16d** (264.0 mg, 0.40 mmol) in *i*-propanol (4 mL) was added a solution of  $\text{Co}(\text{OAc})_2 \cdot 4\text{H}_2\text{O}$  (112.0 mg, 0.45 mmol) in methanol (2 mL). The mixture was heated at reflux for 3 h under argon. The dark brown solution was concentrated and the product was precipitated in 15 mL of hexanes. The green brown solid was recovered by filtration, rinsed with hexanes and then dried under vacuum for 16 h at 80°C to give **17d** (211.9 mg,

73%) as a red/light brown solid. IR (neat) 2966, 2907, 2862, 1560, 1529, 1412, 1380, 1256, 1180, 677  $\text{cm}^{-1}$ ; HRMS (DART-TOF) Calcd for  $\text{C}_{43}\text{H}_{60}\text{CoN}_4\text{O}_2$  ( $\text{M}+\text{H}$ ) $^+$ : 724.41265; found 724.41061.

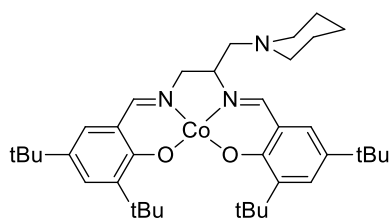

#### Cobalt-Schiff base complex 17e.

To a solution of Schiff base **16e** (241.3 mg, 0.41 mmol) in *i*-propanol (4 mL) was added a solution of  $\text{Co}(\text{OAc})_2 \cdot 4\text{H}_2\text{O}$  (112.1 mg, 0.45 mmol) in methanol (2 mL). The mixture was heated at reflux for 3 h under argon. The dark brown solution was concentrated and the product was precipitated in 15 mL of hexanes. The green brown solid was recovered by filtration, rinsed with hexanes and then dried under vacuum for 16 h at 80°C to give **17e** (221.3 mg,

83%) as a red/light brown solid. IR (neat) 2956, 2869, 1585, 1553, 1529, 1439, 1252, 1173  $\text{cm}^{-1}$ ; HRMS (DART-TOF) Calcd for  $\text{C}_{38}\text{H}_{57}\text{CoN}_3\text{O}_2$  ( $\text{M}+\text{H}$ ) $^+$ : 647.38610; found 647.38379.

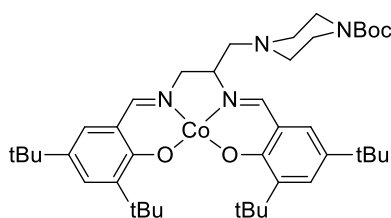

#### Cobalt-Schiff base complex 17f.

To a solution of Schiff base **16f** (161.3 mg, 0.23 mmol) in *i*-propanol (4 mL) was added a solution of  $\text{Co}(\text{OAc})_2 \cdot 4\text{H}_2\text{O}$  (62.3 mg, 0.25 mmol) in methanol (2 mL). The mixture was heated at reflux for 3 h under argon. The dark brown solution was concentrated and the product was precipitated in 15 mL of hexanes. The green brown solid was recovered by filtration, rinsed with hexanes and then dried under vacuum for 16 h at 80°C to give **17f** (156.5 mg,

91%) as a red/light brown solid. IR (neat) 2956, 2869, 1585, 1553, 1529, 1439, 1252, 1173, 674  $\text{cm}^{-1}$ ; HRMS (DART-TOF) Calcd for  $\text{C}_{42}\text{H}_{64}\text{CoN}_4\text{O}_4$  ( $\text{M}+\text{H}$ ) $^+$ : 748.43378; found 748.43343.

## 5. $^1\text{H}$ and $^{13}\text{C}$ -NMR Spectra of New Synthesized Compounds

13

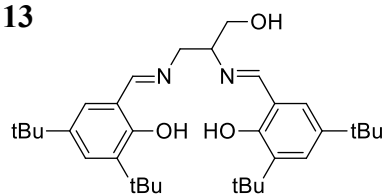

$\text{CDCl}_3$  - 400 MHz

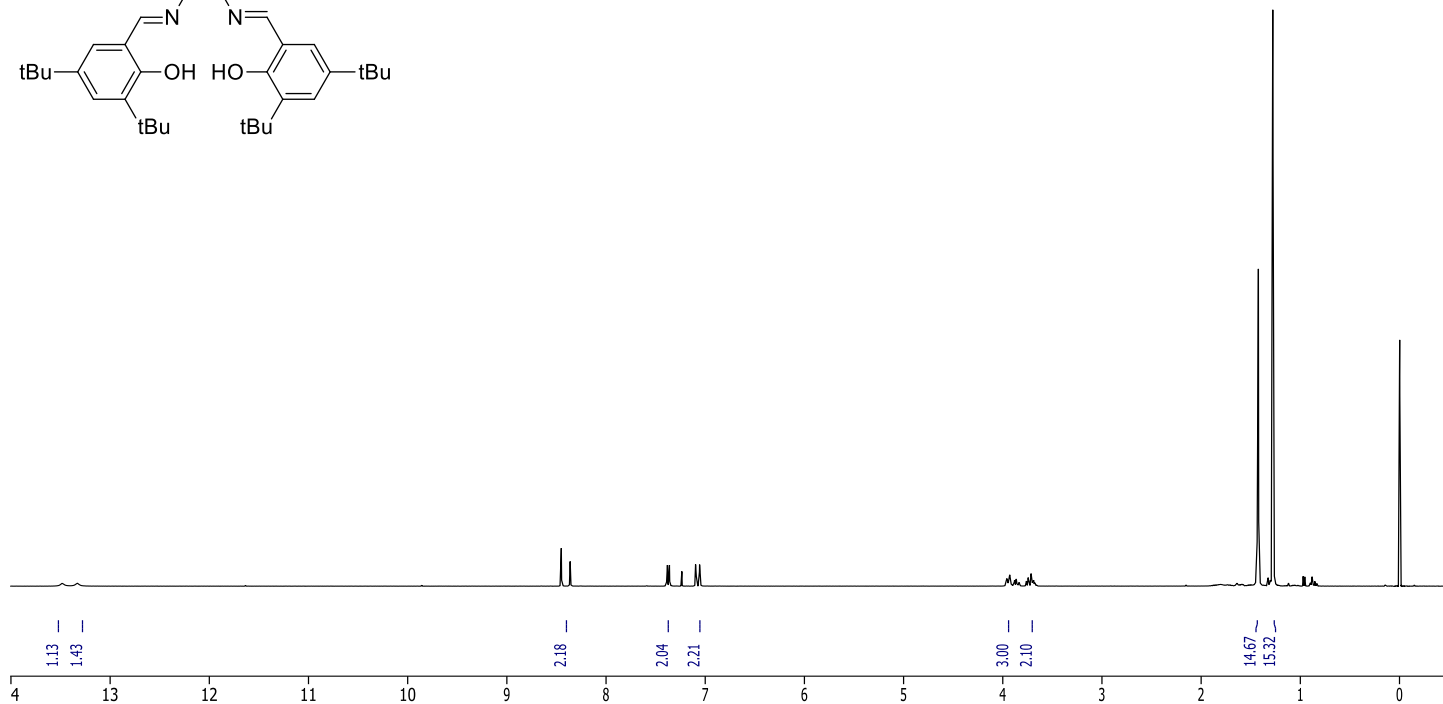

$\text{CDCl}_3$  - 100 MHz

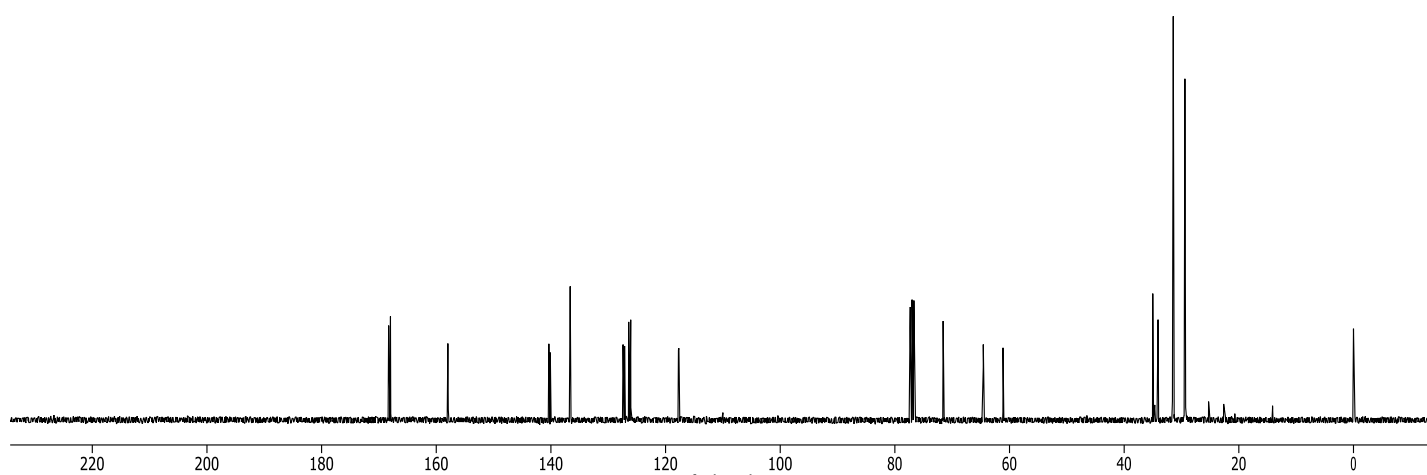



14

CDCl<sub>3</sub> - 400 MHz

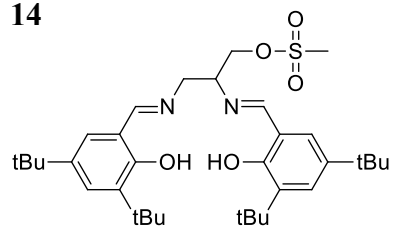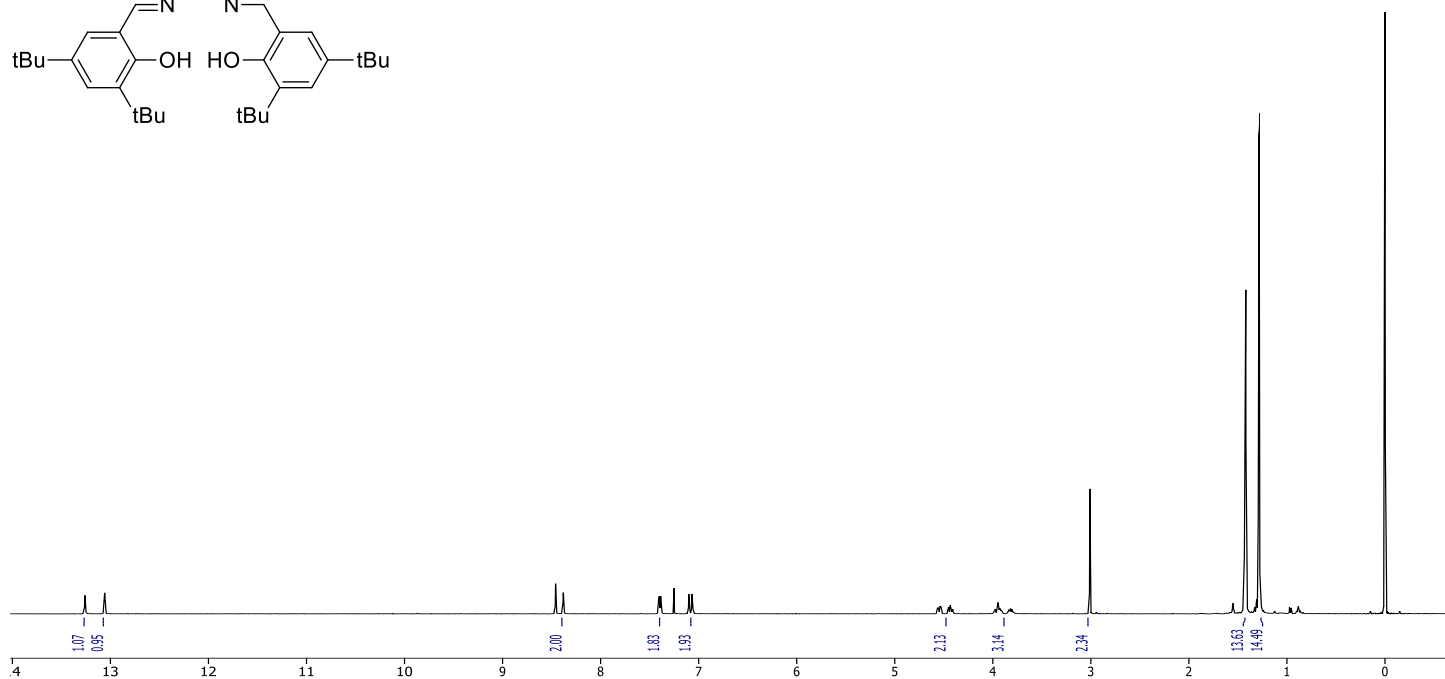

CDCl<sub>3</sub> - 100 MHz

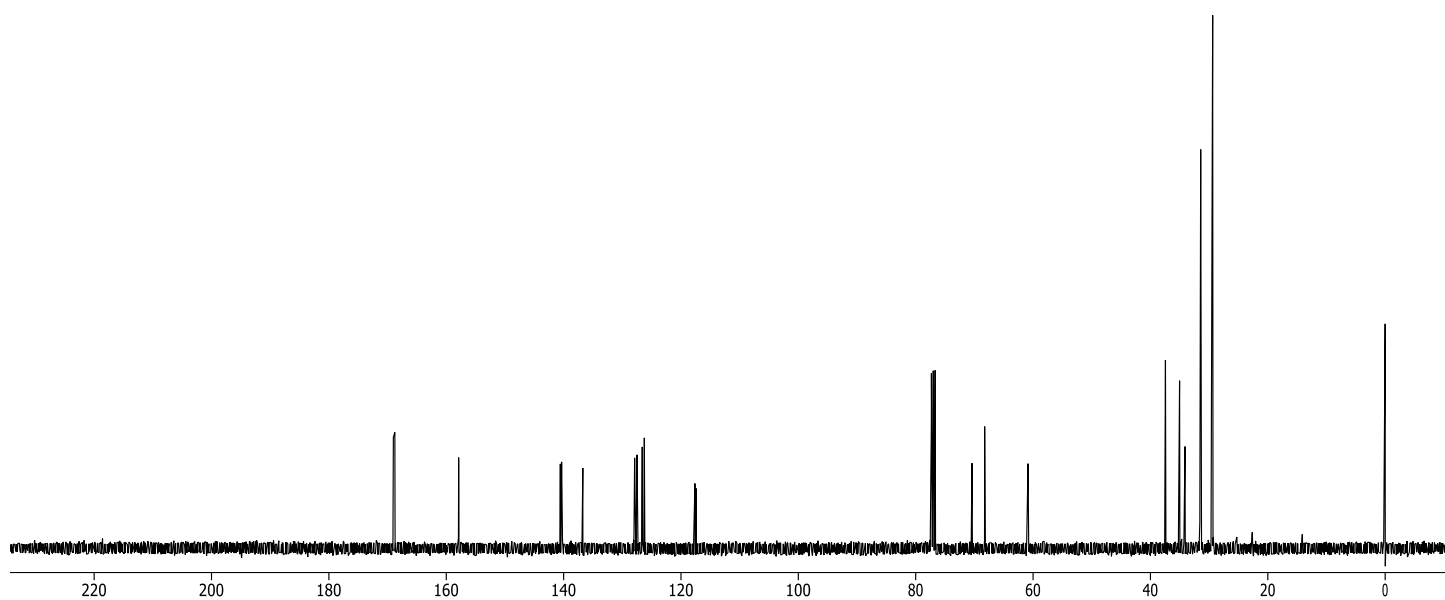

16a

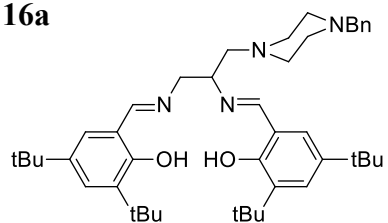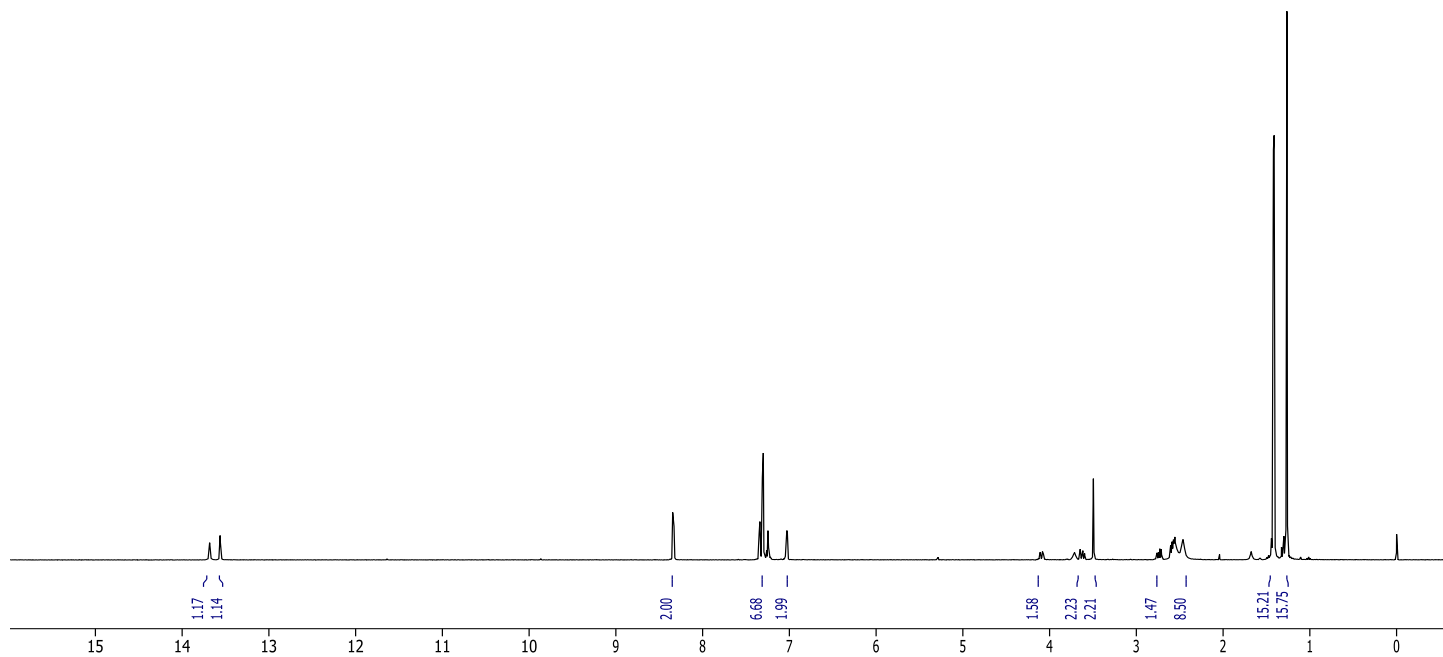

CDCl<sub>3</sub> - 100 MHz

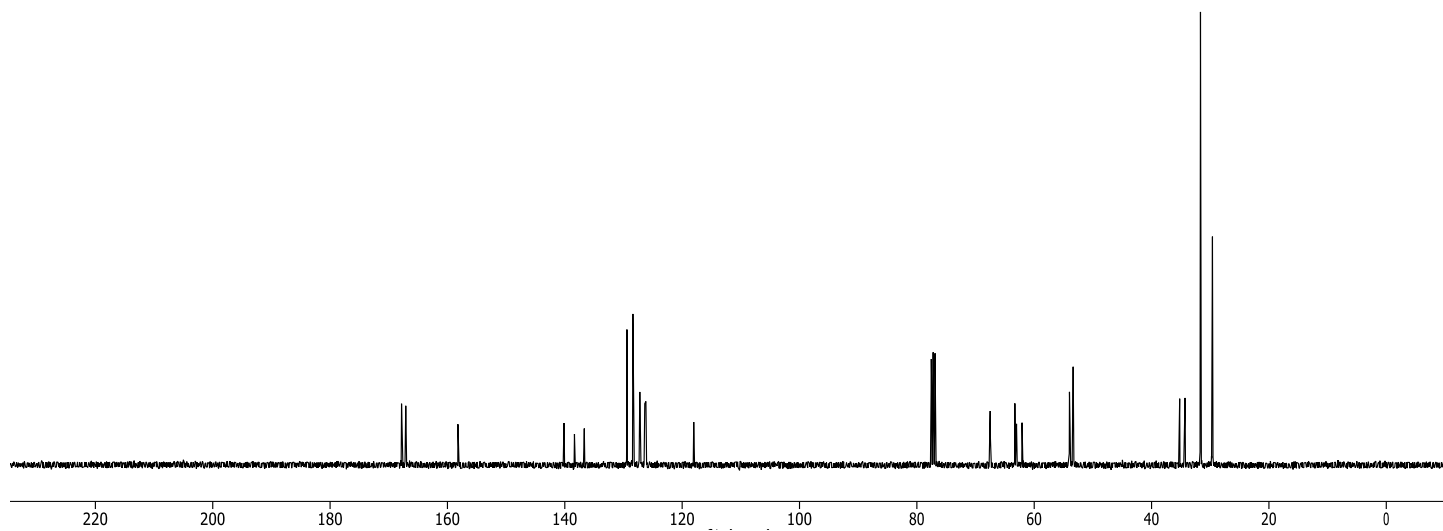

16b

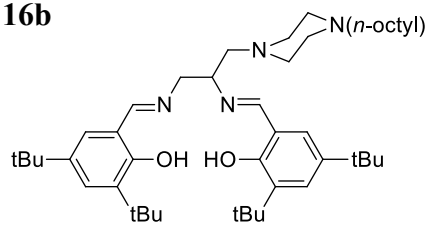

CDCl<sub>3</sub> - 400 MHz

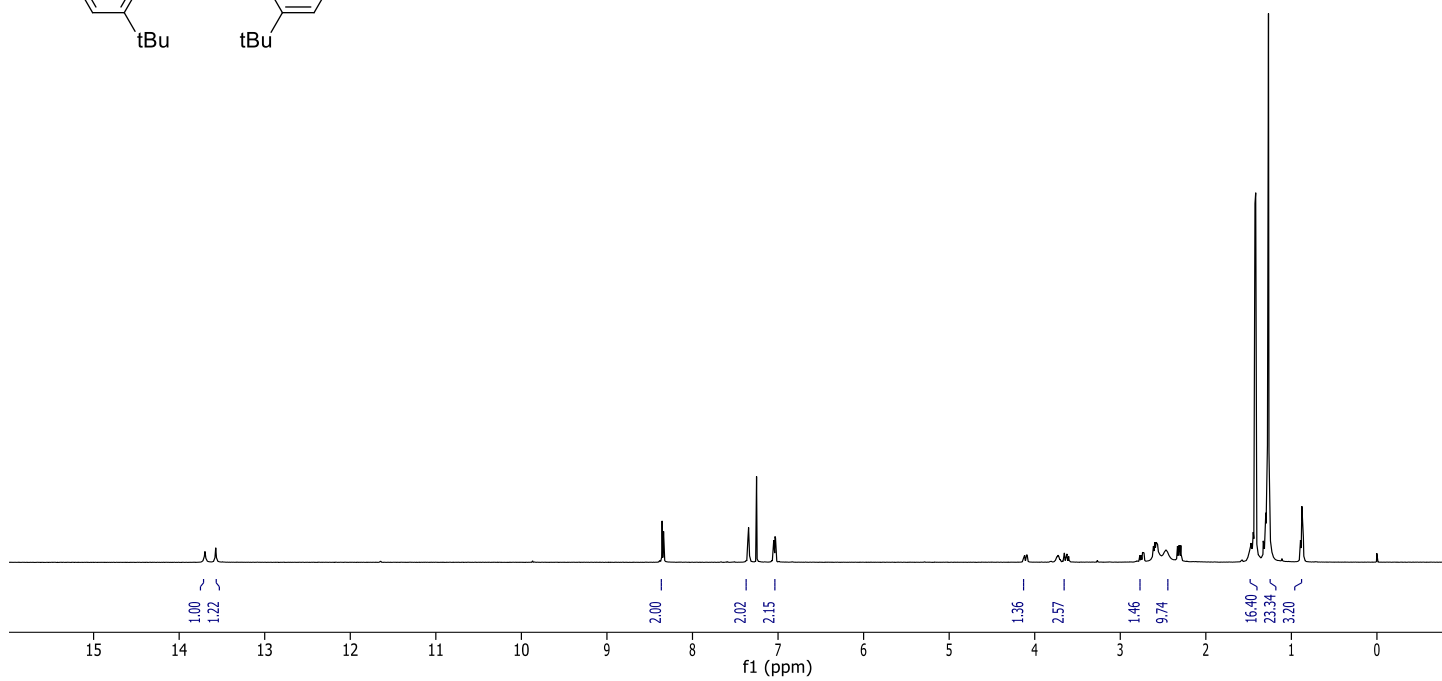

CDCl<sub>3</sub> - 100 MHz

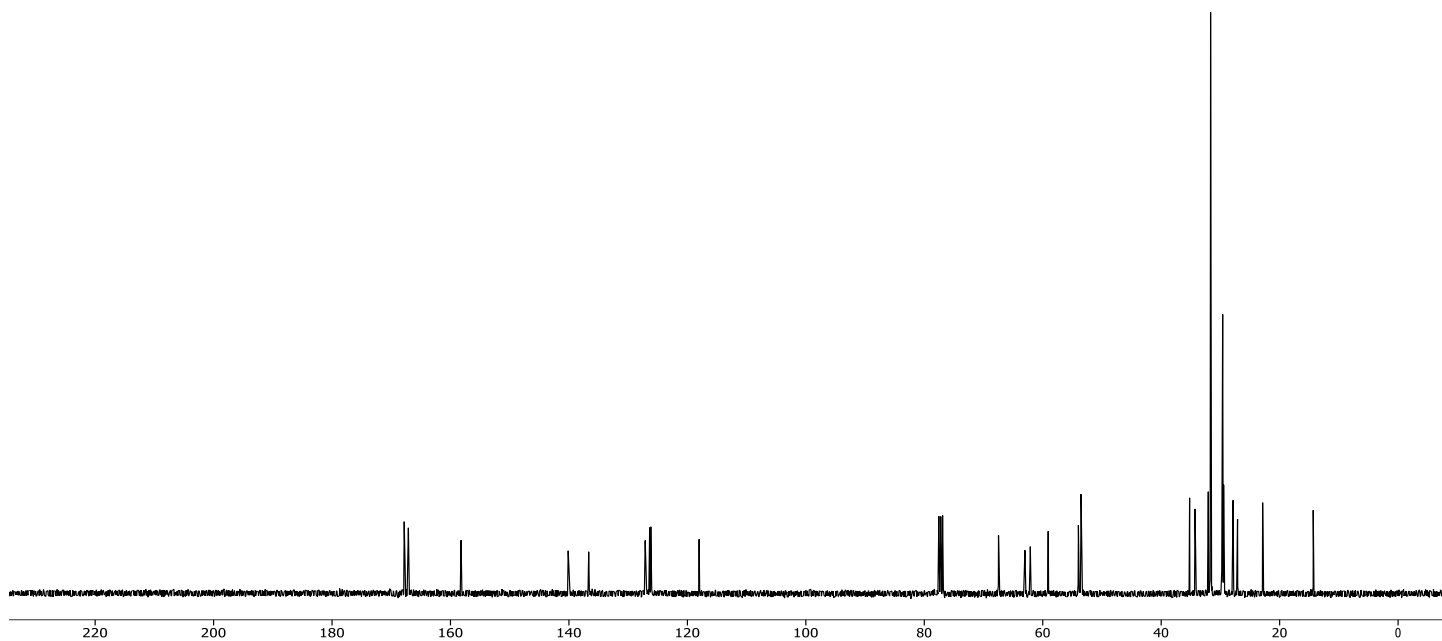

16c

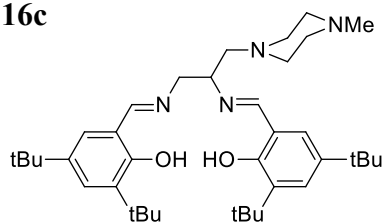

CDCl<sub>3</sub> - 400 MHz

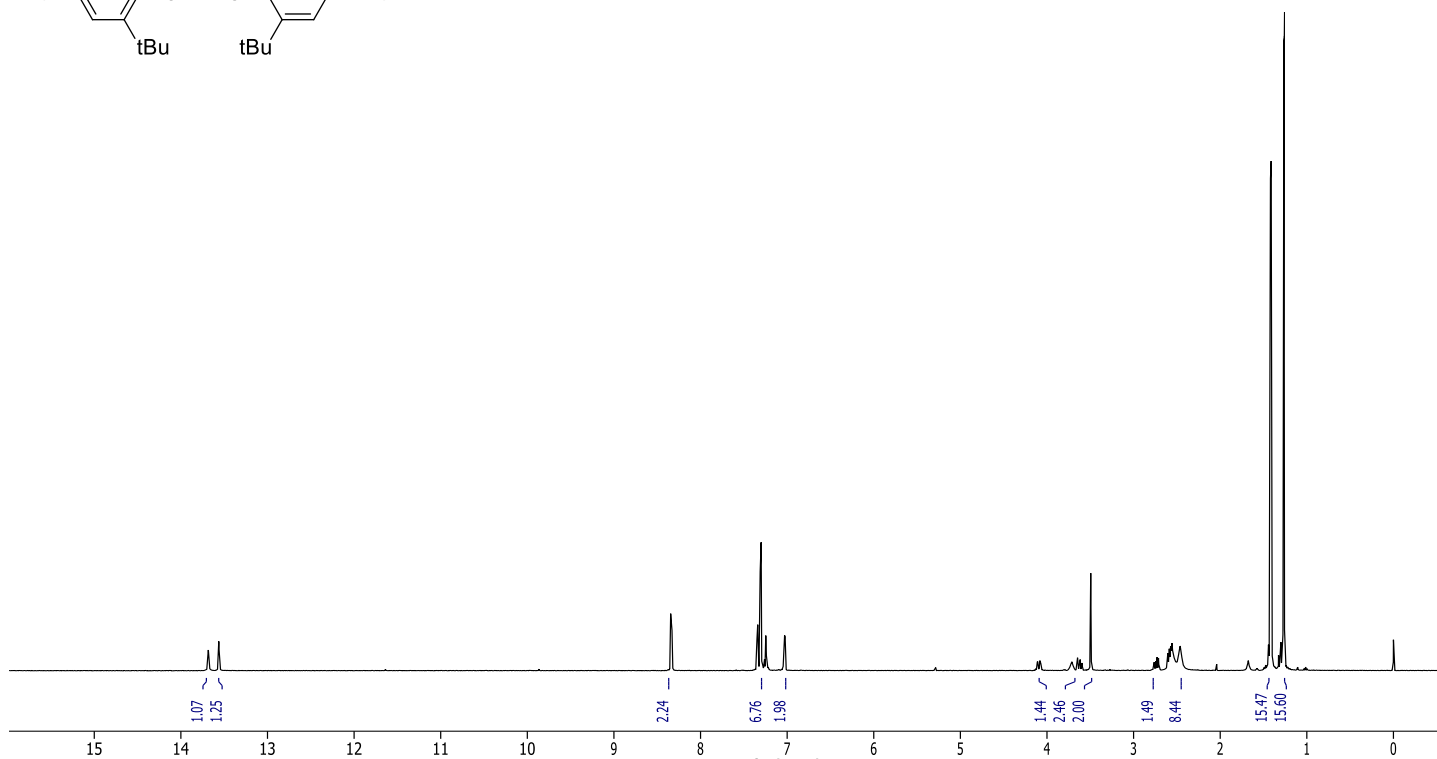

CDCl<sub>3</sub> - 100 MHz

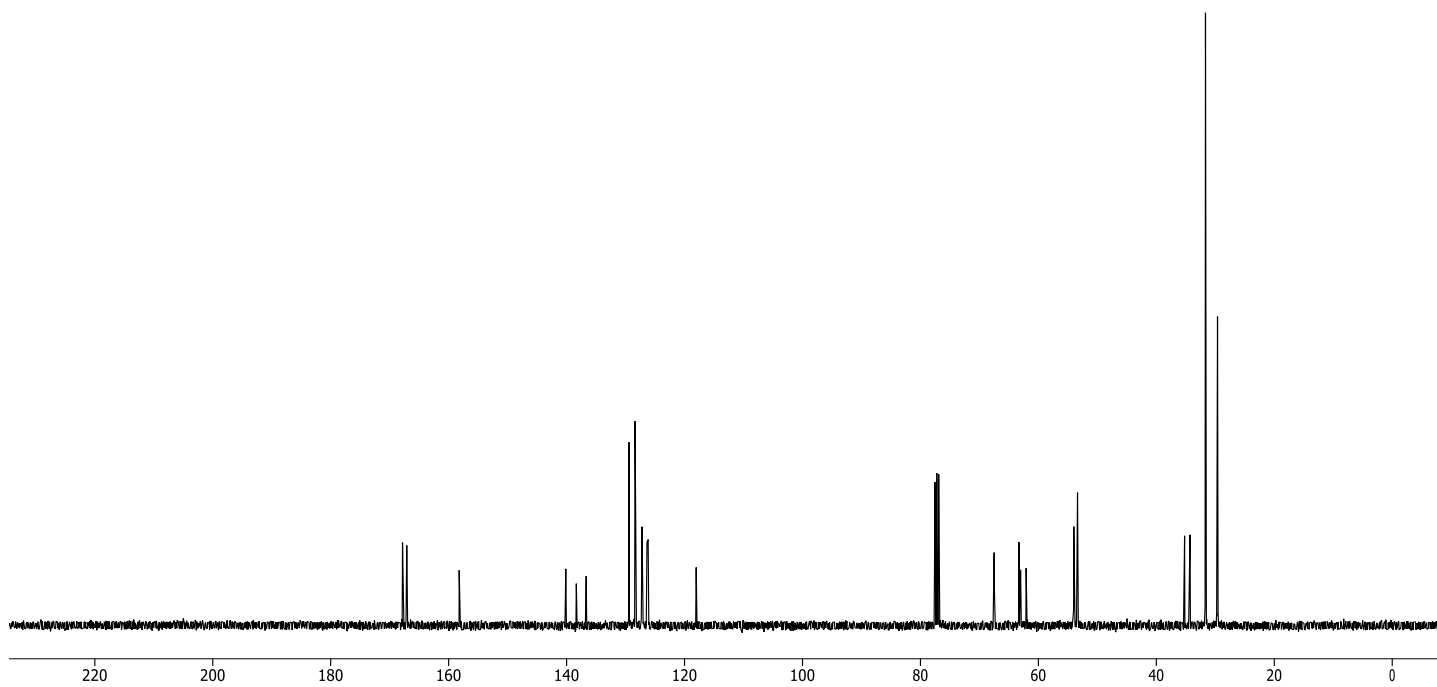

16d

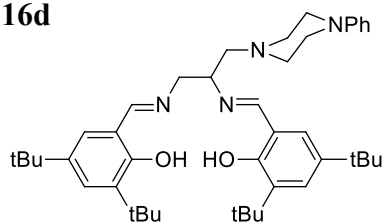

CDCl<sub>3</sub> - 400 MHz

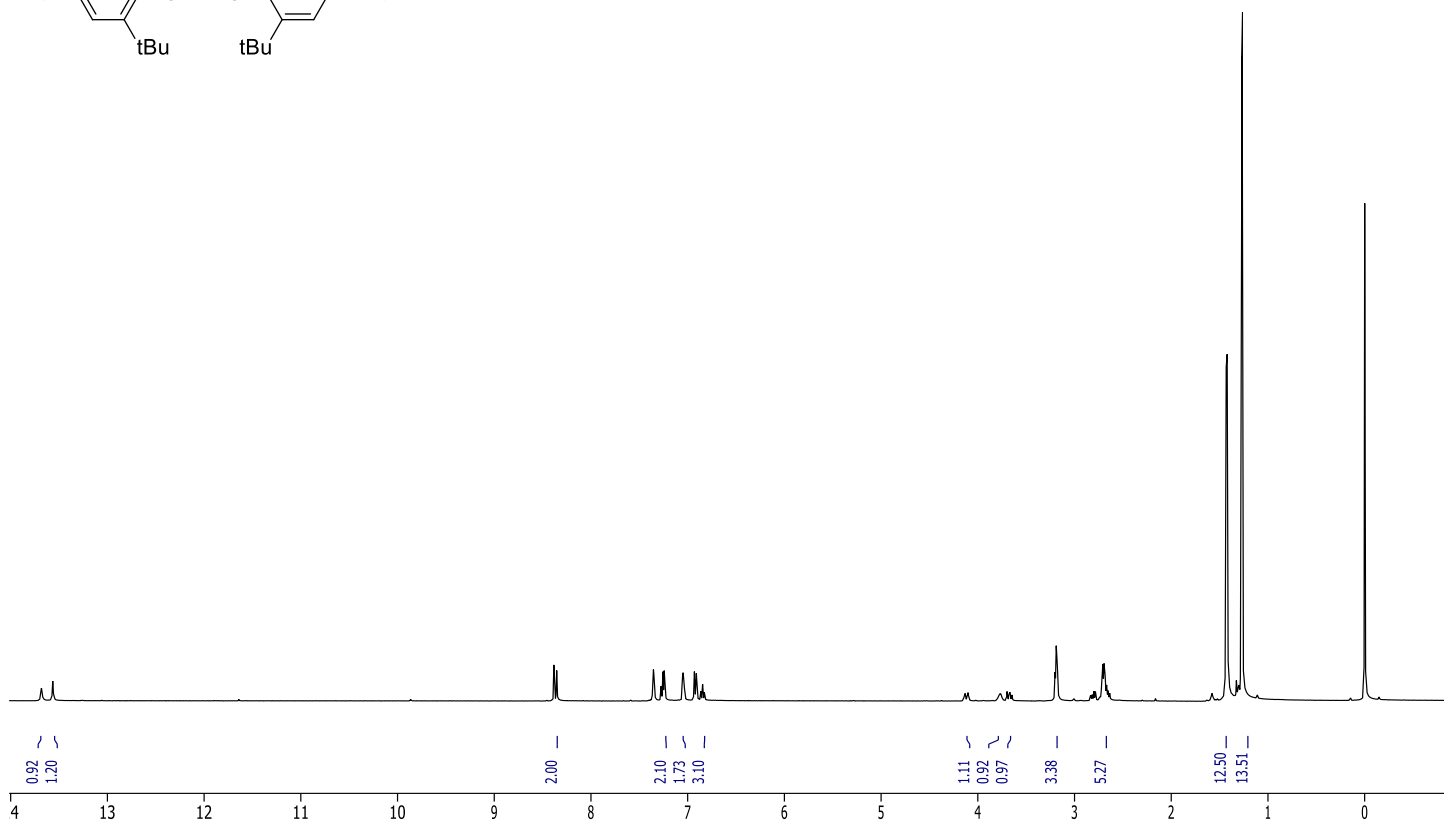

CDCl<sub>3</sub> - 100 MHz

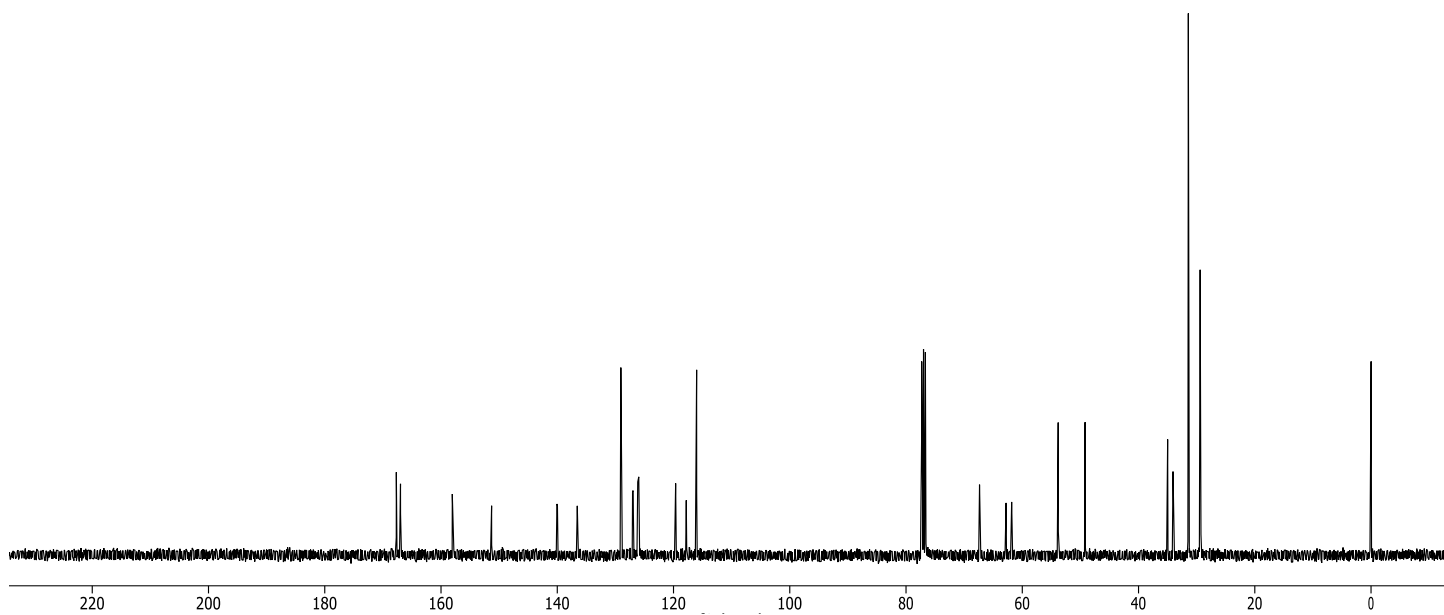

16e

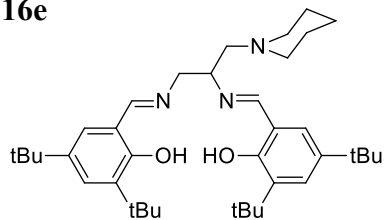

CDCl<sub>3</sub> - 400 MHz

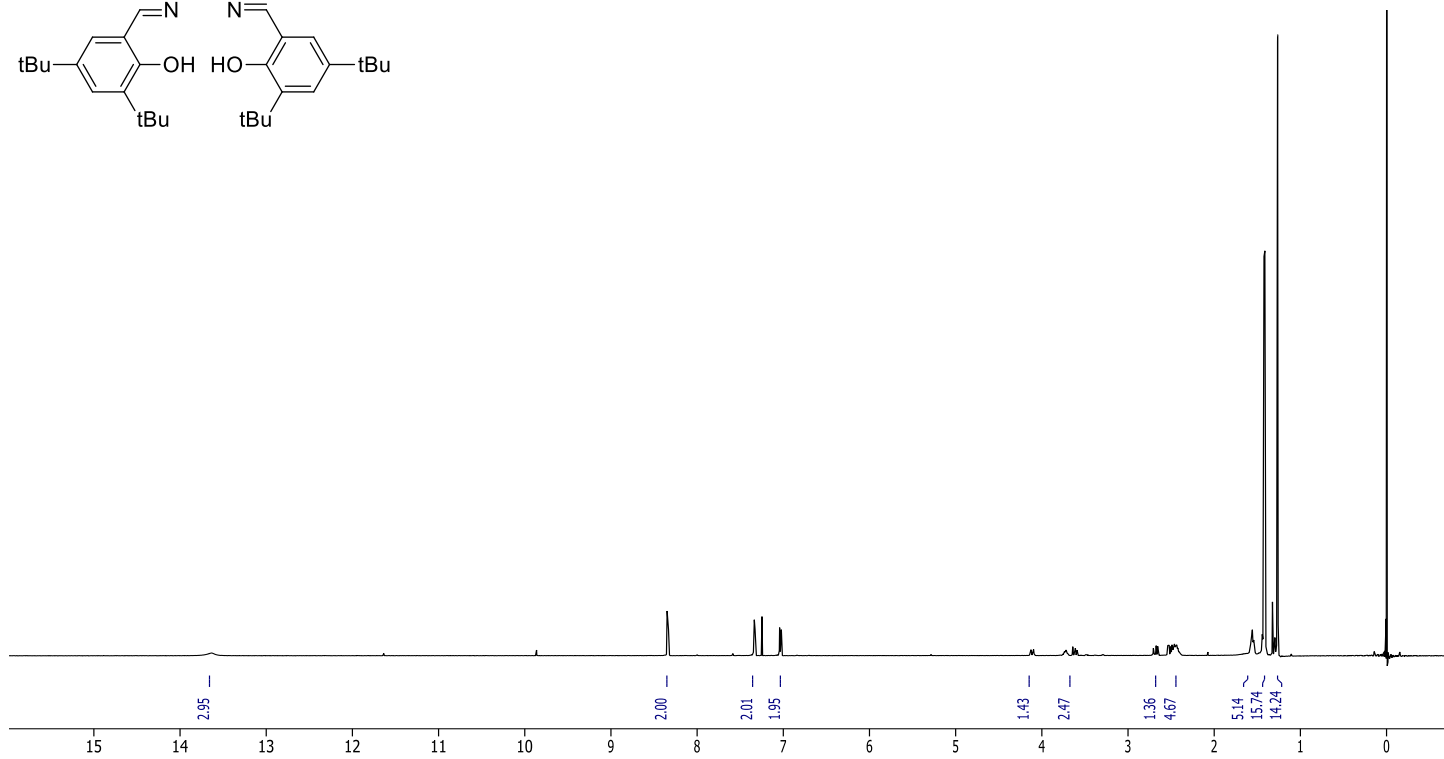

CDCl<sub>3</sub> - 100 MHz

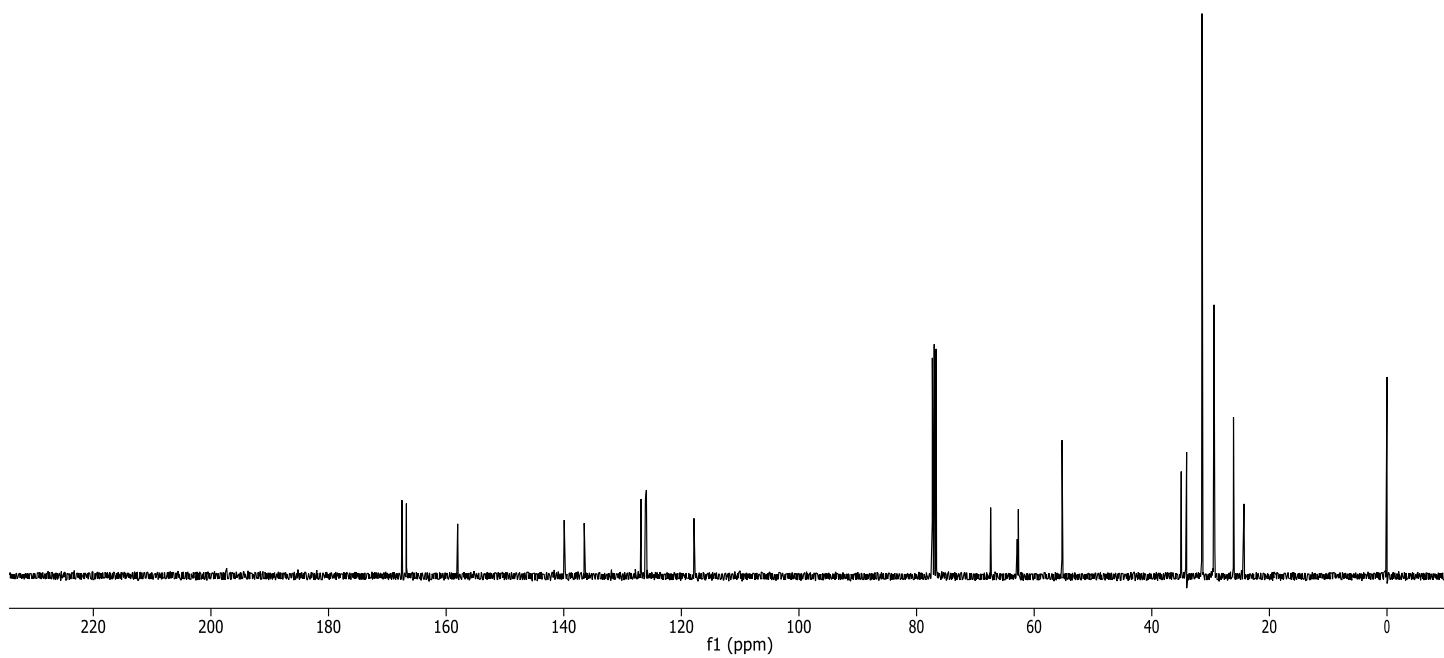

16f

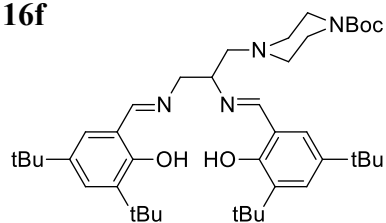

CDCl<sub>3</sub> - 400 MHz

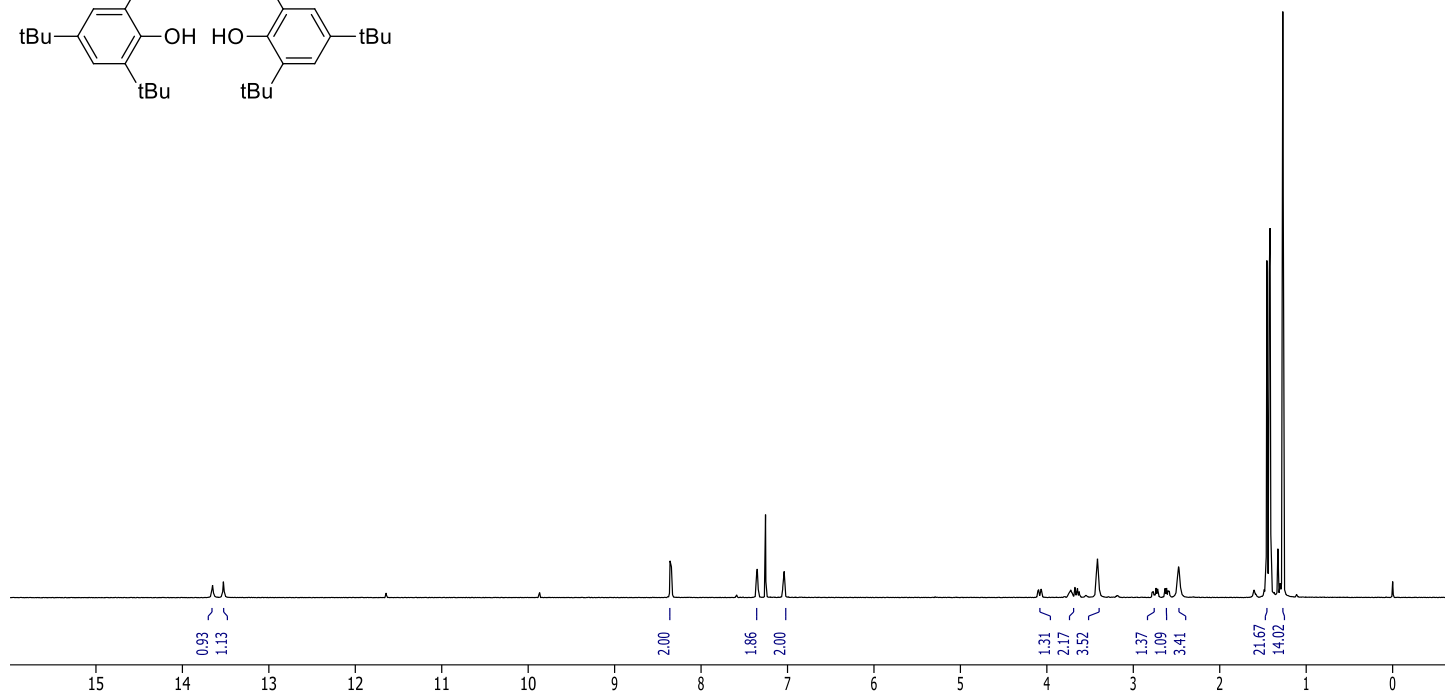

CDCl<sub>3</sub> - 100 MHz

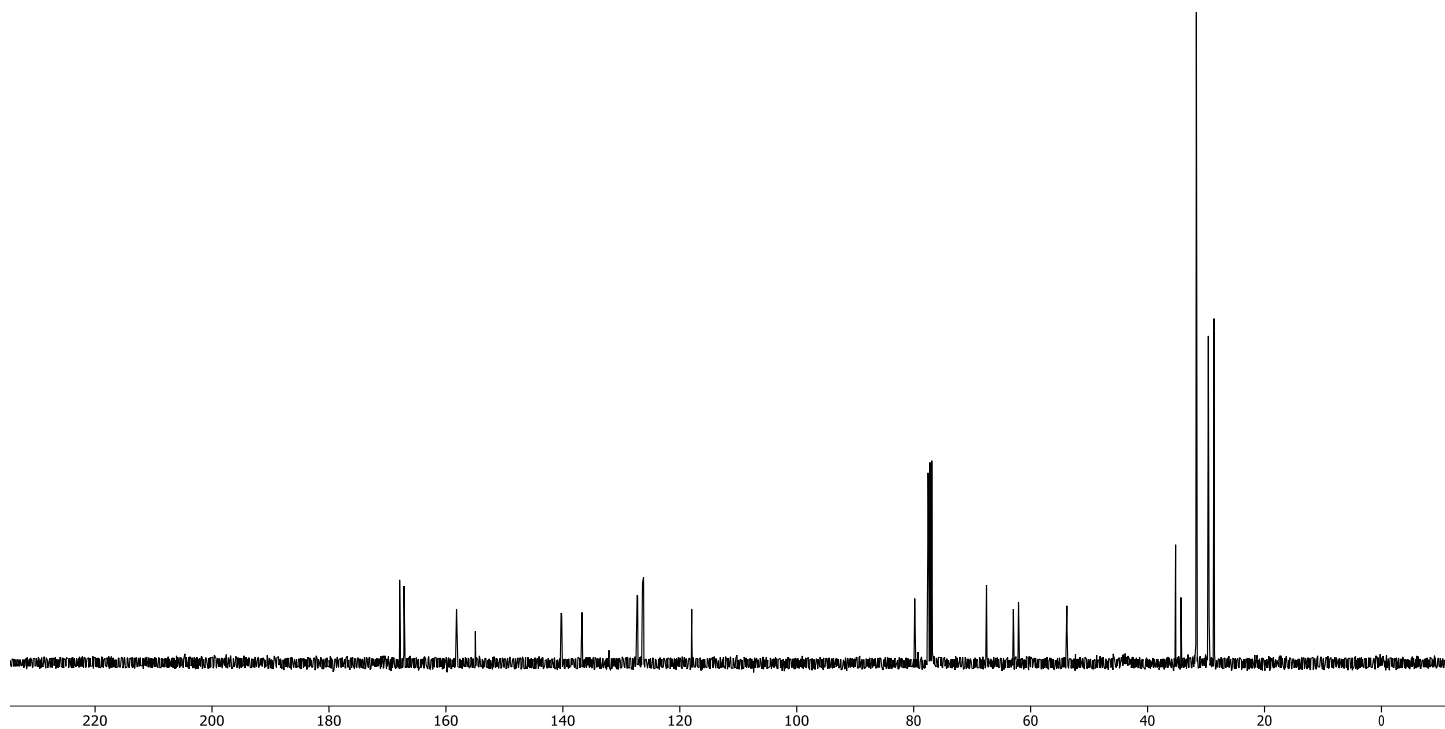

## 6. Computational methodology

All calculations were performed at the M06-2X level of theory with a mixed basis set using 6-31G(d) for C, H, N, and O and the LANL2DZ basis set for Co. Full geometry optimizations were carried out. The structures were modeled as neutral doublets (i.e. a single unpaired electron) with unrestricted calculations done for each structure. All calculations were done using Gaussian 09, revision B.01.

### Conformational differences for representative compounds

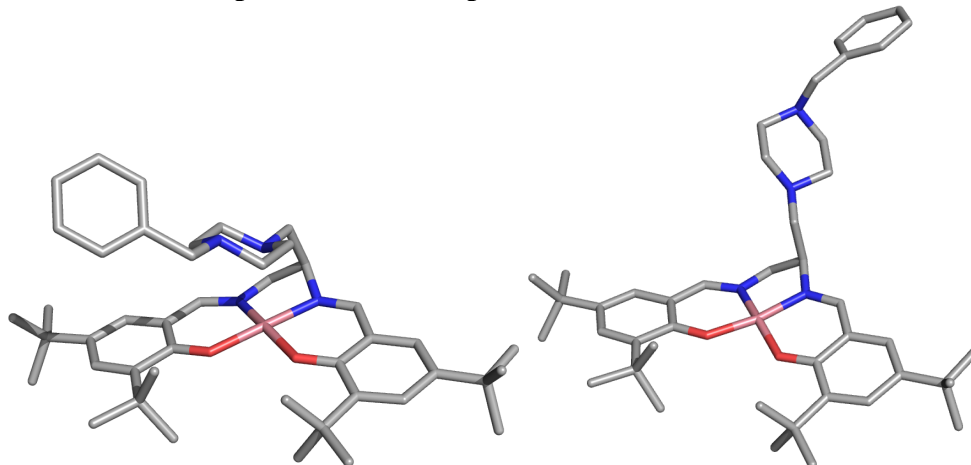

*Endo* and *exo* conformations of complex 17a; the *endo* is 11.24 kcal more stable

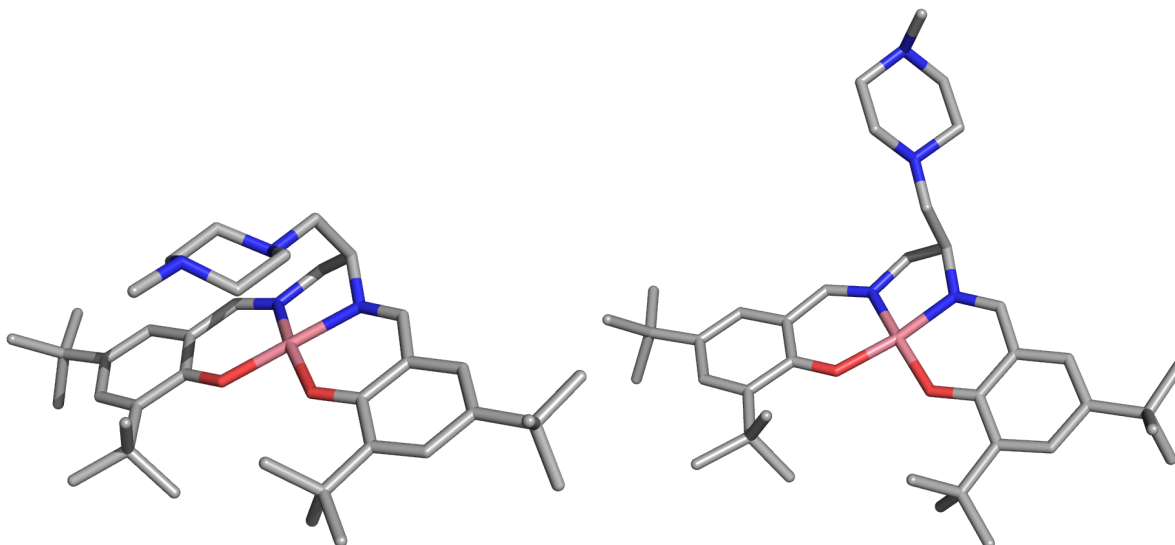

*Exo* and *endo* conformations of complex 17c; the *endo* is 10.51 kcal more stable



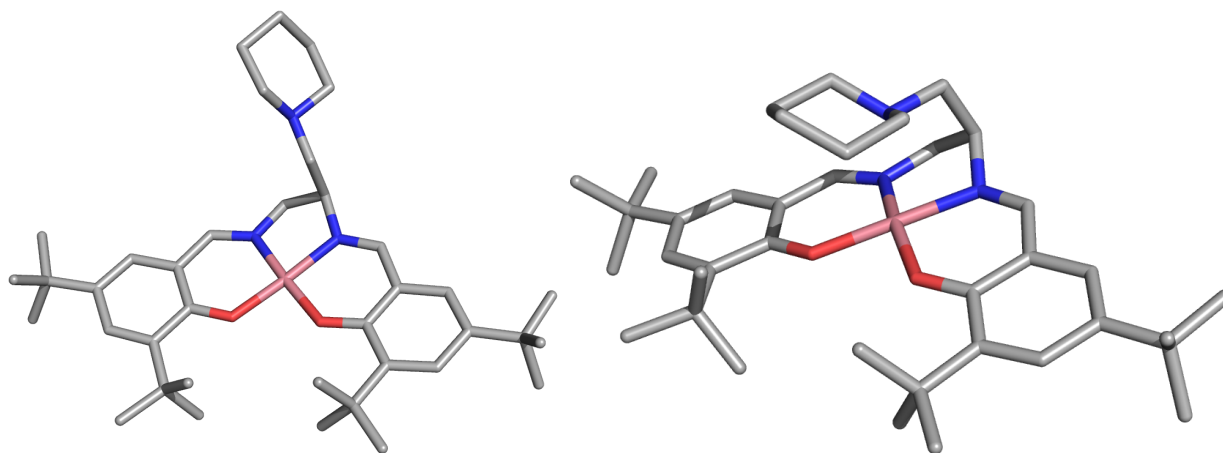

*Exo* and *endo* conformations of 17e; the *endo* is 10.05 kcal more stable
